# Supplementary material
Source: Springer Nature journal article supplement (https://www.springermedizin.de/resource/supplementary/13063_2014_2206_MOESM4_ESM.pdf/9621620)

## Mass Mailing

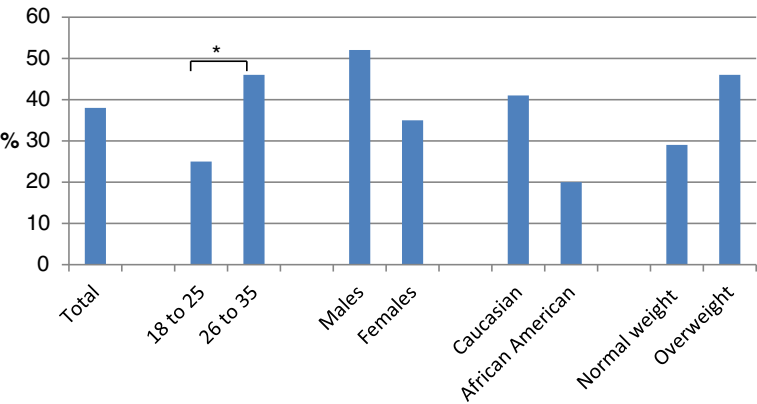

## Email

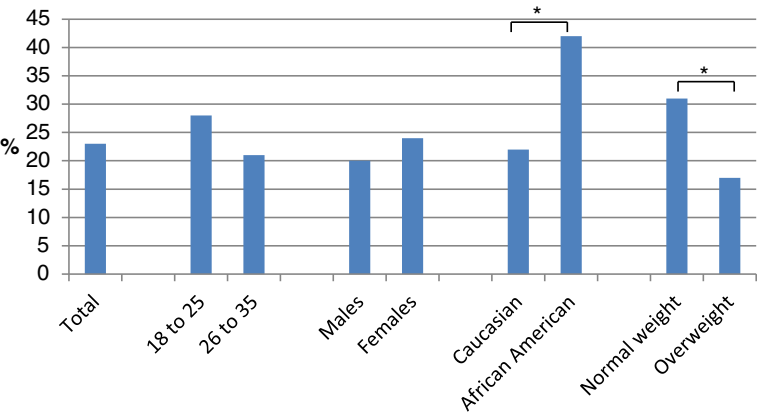

\* indicates significant OR

Supplement: MOESM4 [file 9621620]
